# Supplementary material
Source: publisher figshare collection journal article supplement (https://tandf.figshare.com/ndownloader/files/13754825)
Supplement: Supplementary file 1 [file 13754825]

An integrated approach based on System Dynamics and ANP for evaluating sustainable transportation policies

Reza Sayyadi,

CIISE – EV 8.210

Concordia University, Montreal, Canada

Tel: 514 848 2424 x 7178

Fax: 514 848 3171

Email:reza_say@yahoo.ca

Anjali Awasthi (**Corresponding Author**)

CIISE – EV 7.640

Concordia University, Montreal, Canada

Tel: 514 848 2424 x 5622

Fax: 514 848 3171

Email: awasthi@ciise.concordia.ca
